# Supplementary material for: Effect of Zinc Supplementation on Renal Anemia in 5/6-Nephrectomized Rats and a Comparison with Treatment with Recombinant Human Erythropoietin
Source: PubMed Central journal article supplement (PMC6829362; doi:10.3390/ijms20204985), 2019-10-09
Supplement: ijms-20-04985-s001.pdf [file ijms-20-04985-s001.pdf]

Supplemental Table 1. Hematology of the 5/6-nephrectomized rats injected with saline, ZnSO<sub>4</sub>, or rHuEPO.

|                                             | RBC<br>(10 <sup>6</sup> cells/mm <sup>3</sup> ) | HCT<br>(%)  | Hb<br>(g/dl) | MCV<br>(μm <sup>3</sup> ) | MCH<br>(pg/cell) | MCHC<br>(g/dl) |
|---------------------------------------------|-------------------------------------------------|-------------|--------------|---------------------------|------------------|----------------|
| 1. 5/6-nephrectomized rats (day 25)         |                                                 |             |              |                           |                  |                |
|                                             | 5.58 ±0.43                                      | 36.7 ±2.5   | 15.2 ±0.6    | 66 ±4                     | 27 ±3            | 42 ±3          |
| 2. After 1 <sup>st</sup> injection (day 32) |                                                 |             |              |                           |                  |                |
| a. Saline                                   | 4.87 ±0.20                                      | 33.7 ±1.6   | 15.3 ±0.6    | 69 ±2                     | 31 ±1            | 45 ±2          |
| b. ZnSO <sub>4</sub>                        | 5.05 ±0.59                                      | 33.6 ±2.7   | 15.4 ±0.8    | 67 ±4                     | 31 ±2            | 46 ±2          |
| c. rHuEPO                                   | 5.28 ±0.30*                                     | 35.1 ±0.6   | 15.9 ±0.6    | 67 ±4                     | 30 ±2            | 45 ±2          |
| 3. After 2 <sup>nd</sup> injection (day 39) |                                                 |             |              |                           |                  |                |
| a. Saline                                   | 4.81 ±0.20                                      | 30.9 ±0.9   | 14.9 ±0.3    | 64 ±3                     | 31 ±1            | 48 ±2          |
| b. ZnSO <sub>4</sub>                        | 5.52 ±0.17*                                     | 36.8 ±0.7** | 15.8 ±0.1**  | 67 ±2                     | 29 ±1            | 43 ±1**        |
| c. rHuEPO                                   | 5.36 ±0.17                                      | 35.2 ±0.2** | 15.9 ±0.3**  | 66 ±2                     | 30 ±1            | 45 ±1*         |
| 4. After 3 <sup>rd</sup> injection (day 46) |                                                 |             |              |                           |                  |                |
| a. Saline                                   | 5.83 ±0.18                                      | 37.0 ±1.1   | 15.3 ±0.3    | 64 ±3                     | 26 ±1            | 41 ±2          |
| b. ZnSO <sub>4</sub>                        | 6.43 ±0.37**                                    | 41.8 ±2.7** | 15.3 ±0.6    | 65 ±4                     | 24 ±1            | 37 ±2**        |
| c. rHuEPO                                   | 6.67 ±0.39**                                    | 42.0 ±1.8** | 16.4 ±0.5**  | 63 ±3                     | 25 ±1            | 39 ±1          |

1. Blood of the 5/6-nephrectomized rats (25 day post surgery) were drawn and for analysis. After the blood was drawn, the rats were divided into 3 groups, every 7 days injected with saline, ZnSO<sub>4</sub>, or rHuEPO, respectively for 3 times.

2. RBC total red blood count, HCT hematocrit, Hb hemoglobin, MCV mean corpuscular volume (HCT/RBC × 10), MCH mean corpuscular hemoglobin (Hb/RBC × 10), MCHC mean corpuscular hemoglobin concentration (Hb/HCT × 100)

This table is representative of three different experiments.

\*  $P < 0.05$ , \*\*  $P < 0.01$ , n=6, Significant differences between ZnSO<sub>4</sub>- or rHuEPO- injected and saline-injected rats.

Supplemental Table 2. Hematology of normal rats injected with saline, ZnSO<sub>4</sub>, or rHuEPO.

|                                             | RBC<br>(10 <sup>6</sup> cells/mm <sup>3</sup> ) | HCT<br>(%)   | Hb<br>(g/dl) | MCV<br>(μm <sup>3</sup> ) | MCH<br>(pg/cell) | MCHC<br>(g/dl) |
|---------------------------------------------|-------------------------------------------------|--------------|--------------|---------------------------|------------------|----------------|
| 1. Normal rats (day 25)                     |                                                 |              |              |                           |                  |                |
|                                             | 6.46 ± 0.37                                     | 48.0 ± 1.9   | 16.0 ± 0.8   | 74 ± 3                    | 25 ± 2           | 33 ± 2         |
| 2. After 1 <sup>st</sup> injection (day 32) |                                                 |              |              |                           |                  |                |
| a. Saline                                   | 5.63 ± 0.52                                     | 37.7 ± 1.9   | 15.1 ± 0.8   | 67 ± 2                    | 27 ± 1           | 40 ± 2         |
| b. ZnSO <sub>4</sub>                        | 5.75 ± 0.39                                     | 40.3 ± 3.1   | 15.6 ± 0.5   | 70 ± 3                    | 27 ± 2           | 39 ± 3         |
| c. rHuEPO                                   | 5.77 ± 0.31                                     | 38.6 ± 3.1   | 15.0 ± 1.0   | 67 ± 3                    | 26 ± 2           | 39 ± 3         |
| 3. After 2 <sup>nd</sup> injection (day 39) |                                                 |              |              |                           |                  |                |
| a. Saline                                   | 6.28 ± 0.29                                     | 42.6 ± 0.7   | 16.5 ± 0.4   | 68 ± 3                    | 26 ± 1           | 39 ± 1         |
| b. ZnSO <sub>4</sub>                        | 6.67 ± 0.51                                     | 41.4 ± 2.2   | 17.1 ± 0.4   | 62 ± 3*                   | 26 ± 2           | 41 ± 2         |
| c. rHuEPO                                   | 6.21 ± 0.24                                     | 42.9 ± 0.7   | 17.3 ± 0.4   | 69 ± 3                    | 28 ± 2           | 40 ± 1         |
| 4. After 3 <sup>rd</sup> injection (day 46) |                                                 |              |              |                           |                  |                |
| a. Saline                                   | 6.26 ± 0.24                                     | 40.7 ± 0.9   | 16.7 ± 0.3   | 65 ± 2                    | 27 ± 1           | 41 ± 1         |
| b. ZnSO <sub>4</sub>                        | 6.16 ± 0.37                                     | 42.4 ± 2.2   | 17.0 ± 0.2   | 69 ± 3*                   | 28 ± 1           | 40 ± 2         |
| c. rHuEPO                                   | 6.48 ± 0.26                                     | 43.3 ± 1.0** | 17.6 ± 0.5   | 67 ± 1                    | 27 ± 1           | 41 ± 1         |

Normal rats of same age and lot to those of the 5/6-nephrectomized were studied in a similar way as that in Table S1.
